# Supplementary material for: Analysing oxygen reduction electrocatalysis on transition metal doped niobium oxide(110)
Source: Royal Society of Chemistry journal article supplement (doi:10.1039/d1cp05725a), 2022-01-01
Supplement: d1cp05725a1.pdf [file d1cp05725a1.pdf]

## Supporting Information

### Analysing Oxygen Reduction Electrocatalysis on Transition Metal doped Niobium oxide (110)

Christina Susan Abraham, <sup>†, a</sup> Megha Anand, <sup>†, a</sup> Sara R. Kelly, <sup>b</sup> Zhenbin Wang, <sup>a</sup>  
and Jens K. Nørskov <sup>\*, a</sup>

a. Center for Catalysis Theory, Technical University of Denmark, Fysikvej Building 311,  
2800 Kongens Lyngby, Denmark

b. Department of Chemical Engineering, Stanford University, Stanford, CA 94305, USA

† These authors contributed equally.

\* Corresponding author Corresponding author: [jkno@dtu.dk](mailto:jkno@dtu.dk)

| Sl. No. | Content                                                                                           | Page No. |
|---------|---------------------------------------------------------------------------------------------------|----------|
| 1.      | Fundamentals of ORR (Reaction pathway)                                                            | S4       |
| 2.      | Computational Methods                                                                             | S4       |
| 3.      | Surface Pourbaix Analysis                                                                         | S6       |
| 4.      | Analyzing the stability of doped system in terms of the formation energies at standard conditions | S7       |
| 4.1     | Range of O chemical potential                                                                     | S7       |
| 4.2     | Oxygen molecule chemical potential                                                                | S7       |
| 4.3     | Enthalpy of formation of stable form of dopant                                                    | S8       |
| 5.      | Structural modification of doped niobium pentoxide systems, M-Nb <sub>31</sub> O <sub>80</sub>    | S11      |
| 6.      | Linear Scaling relations                                                                          | S12      |
| 6.1     | Linear scaling relations between GOOH* vs GOH*                                                    | S12      |
| 6.2     | Linear scaling relations between GO* vs GOH*                                                      | S13      |
| 7.      | OH binding energy of IrO <sub>2</sub> (110)                                                       | S16      |
|         | References                                                                                        | S17      |

## List of figures

| Sl. No. | Content                                                                                                                                                                                                                                                                    | Page No. |
|---------|----------------------------------------------------------------------------------------------------------------------------------------------------------------------------------------------------------------------------------------------------------------------------|----------|
| S1      | Crystal structures of Nb <sub>2</sub> O <sub>5</sub> .....                                                                                                                                                                                                                 | S5       |
| S2      | Side view of the pristine stoichiometric metal doped Nb <sub>2</sub> O <sub>5</sub> (110) surface. Surface and sub-surface doping sites are considered for TM atoms. (b) Calculated formation energy per O atom (eV) of transition metal doped niobium oxide systems. .... | S6       |
| S3      | Range of allowed O chemical potentials .....                                                                                                                                                                                                                               | S7       |
| S4 (a)  | <b>Side view of ORR adsorbate:</b> OOH adsorbed on Rh, Re and Pt doped Nb <sub>32-x</sub> O <sub>80</sub> where the binding site is the dopant (c <sub>1</sub> ) .....                                                                                                     | S12      |
| S4 (b)  | <b>Side view of ORR adsorbate:</b> OH adsorbed on Cr, Mn (c <sub>1</sub> ) and Co (c <sub>2</sub> ) doped Nb <sub>32-x</sub> O <sub>80</sub> . ....                                                                                                                        | S12      |
| S5      | <b>Side view of ORR adsorbate:</b> O adsorbed on Co, Zn, Rh, Au and Cu doped Nb <sub>32-x</sub> O <sub>80</sub> where the binding site is the Nb metal atom site (c <sub>2</sub> ) .....                                                                                   | S13      |
| S6      | Free energies versus applied potential (vs RHE) for different surface coverages on Ir-Nb <sub>31</sub> O <sub>80</sub> (110) at pH = 0. ....                                                                                                                               | S14      |
| S7      | <b>Calculated TDOS and PDOS</b> of (a) Nb <sub>32</sub> O <sub>80</sub> (110), (b) Mo-Nb <sub>31</sub> O <sub>80</sub> (c) 2Mo-Nb <sub>30</sub> O <sub>80</sub> . ....                                                                                                     | S15      |
| S8      | <b>Kinetic volcano model</b> for the 4e- ORR process at 0.8 V <sub>RHE</sub> .....                                                                                                                                                                                         | S15      |
| S9      | <b>Comparing free energies of different OH coverage surfaces sampled for IrO<sub>2</sub> (110) (pH = 0)</b> .....                                                                                                                                                          | S16      |

## List of tables

| <b>Sl. No.</b> | <b>Content</b>                                                                                                                                                        | <b>Page No.</b> |
|----------------|-----------------------------------------------------------------------------------------------------------------------------------------------------------------------|-----------------|
| S1             | Free energy of reference molecules .....                                                                                                                              | S4              |
| S2             | Enthalpy of formation and free energy of formation of the oxide form of the dopant metal at standard conditions .....                                                 | S9              |
| S3             | Bond distances between the dopant transition metal and the surrounding O atoms in the M-Nb <sub>31</sub> O <sub>80</sub> systems (M = dopant transition metals) ..... | S11             |
| S4             | Differential OH binding energy at high coverage on IrO <sub>2</sub> (110) .....                                                                                       | S16             |

## 1. Fundamentals of ORR (Reaction pathway)

The binding free energy ( $\Delta G_{\text{ads}}$ ) of an ORR intermediate on a catalyst slab is calculated relative to the pristine slab (with no adsorbate),  $\text{H}_2\text{O}$  (g) and  $\text{H}_2$  (g). Thus,

$$\Delta G_{\text{ads}} = \Delta E_{\text{ads}} + \Delta G_{\text{correction}}$$

where  $\Delta E_{\text{ads}}$  represents the relative DFT energy of the adsorbate-catalyst system and  $\Delta G_{\text{correction}}$  is the free energy correction taken from reference.<sup>1</sup>

**Table S1** | Free energy of reference molecules optimized in a  $20 \times 20 \times 20 \text{ \AA}^3$  cell.

| Molecule                  | E       | ZPE   | TS    | $\int C_p dT$ | ZPE-<br>TS+ $\int C_p dT$ | $\Delta G_{\text{correction}}$ | G       |
|---------------------------|---------|-------|-------|---------------|---------------------------|--------------------------------|---------|
| $\text{H}_2\text{O}$      | -14.691 | 0.567 | 0.675 | 0.104         | -0.004                    |                                | -14.695 |
| $\text{H}_2$              | -7.046  | 0.271 | 0.407 | 0.09          | -0.046                    |                                | -7.092  |
| $\text{OOH}^* \text{ }^1$ |         | 0.464 | 0.096 | 0.058         | 0.426                     | 0.365                          |         |
| $\text{O}^* \text{ }^1$   |         | 0.093 | 0.035 | 0.023         | 0.081                     | 0.039                          |         |
| $\text{OH}^* \text{ }^1$  |         | 0.354 | 0.1   | 0.053         | 0.307                     | 0.288                          |         |

In addition to the entropic and zero-point energy corrections, solvation correction is also considered. Explicit solvation decreases the binding energies of  $\text{OOH}^*$  and  $\text{OH}^*$  by 0.40 eV and 0.15eV<sup>2</sup> respectively. The change in binding energy for  $\text{O}^*$  is negligible.

## 2. Computational Methods

In the present study we selected  $\text{Nb}_2\text{O}_5$  with space groups: C2/m [12], P1[1],  $P\bar{1}$ [2], P2[3], I4/mmm [139] and P2<sub>1</sub>2<sub>1</sub>2<sub>1</sub> [19]. All these materials have an  $E_{\text{hull}}$  lower than 0.15eV/atom.  $E_{\text{hull}}$  is used as a criterion to estimate the stability of the candidate material and thereby predict its synthesizability.<sup>3</sup> The systems have similar electronic energies. The band gap of the tetragonal  $\text{Nb}_2\text{O}_5$  crystal system is the lowest in comparison to the rest of the reported  $\text{Nb}_2\text{O}_5$  crystal systems in Materials project<sup>†1</sup> and so, for further analysis, the tetragonal crystal  $\text{Nb}_2\text{O}_5$  system was used. Hubbard U correction values were considered for select 3d transition metal dopant systems.

<sup>†</sup> It is worth noting that the semi-local DFT used in Material project data tends to severely underestimate bandgaps.

| Materials Id     | Space group         | Crystal system    | Structure                                                                             |
|------------------|---------------------|-------------------|---------------------------------------------------------------------------------------|
| mp-680944        | P1 [1]              | Triclinic         | 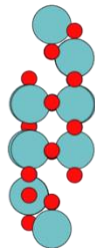   |
| mp-766361        | P1 [2]              | Triclinic         |    |
| mp-581967        | P2 [3]              | Monoclinic        |    |
| <b>mp-556048</b> | <b>I4/mmm [139]</b> | <b>Tetragonal</b> |  |
| mp-776896        | P212121 [19]        | Orthorhombic      |  |

**Fig. S1 | Crystal structures of Nb<sub>2</sub>O<sub>5</sub>.** For further analysis the tetragonal crystal system (highlighted in green) is used.

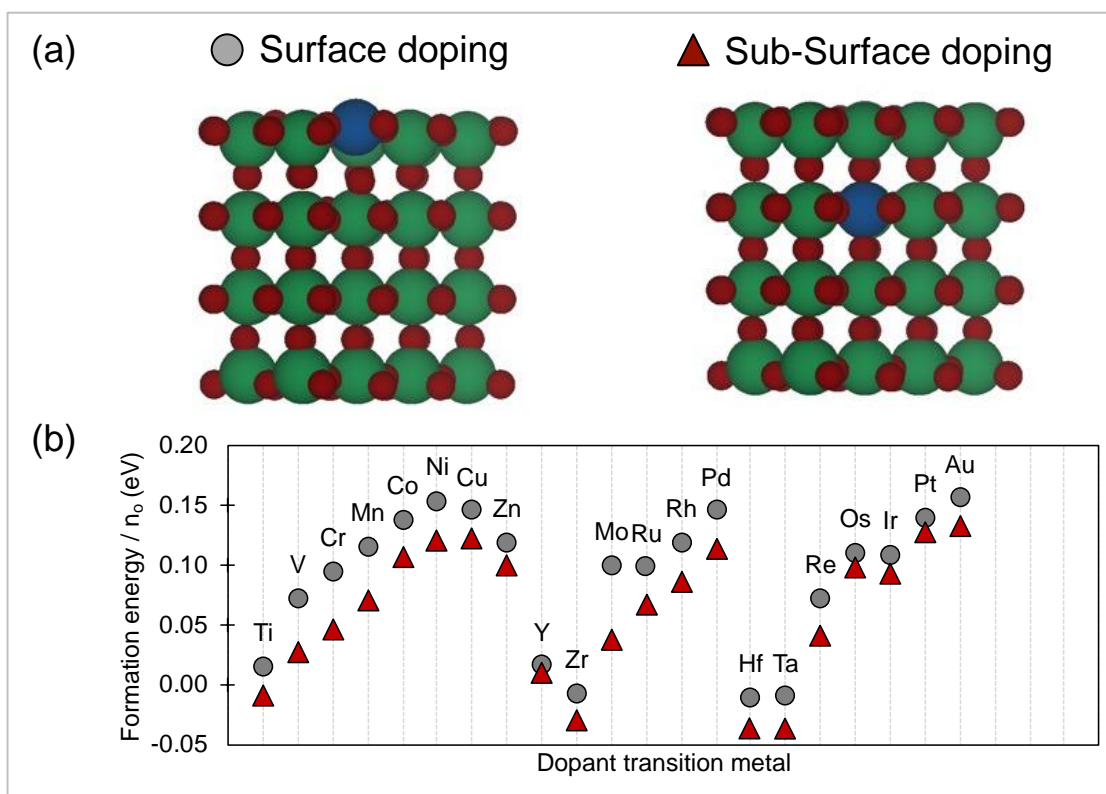

**Fig. S2** | (a) Side view of the pristine stoichiometric metal doped Nb<sub>2</sub>O<sub>5</sub> (110) surface. Surface and sub-surface doping sites are considered for TM atoms. Colour code: Nb (green), oxygen (maroon) and TM dopant (blue). (b) Calculated formation energy per O atom (eV) of transition metal doped niobium oxide systems. Circle and triangle markers corresponds to surface and sub-surface doping sites respectively.

### 3. Surface Pourbaix Analysis

Under ORR conditions, the oxide system might differ from its initial stoichiometric pristine form. It is therefore important to analyze the coverage of the catalyst surface. Surface Pourbaix analysis gives a good approximation of surface coverage under ORR reaction conditions.<sup>4</sup> Considering a metal surface M with \* representing the site of adsorption in its pristine state, O<sub>x</sub>H<sub>y</sub> the ORR adsorption intermediates (x and y are the number of oxygen and hydrogen atoms respectively),  $k_B$  is the Boltzmann constant, and  $T$  is the temperature, then associated free energy change for adsorption of O<sub>x</sub>H<sub>y</sub> intermediates is given by:

$$\Delta G(U, \text{pH}) = G_{S-O_xH_y^*} - G_{S^*} - xG_{H_2O} + (2x - y) \left( \frac{1}{2} G_{H_2} - U_{SHE} - 2.303k_B T \text{pH} \right)$$

## 4. Analyzing the stability of doped system in terms of the formation energies

### 4.1 Range of O chemical potential

The method described in this section has been explained in detail by Reuter et. al.<sup>5</sup>

The Gibbs free energy of bulk niobium oxide  $g_{\text{Nb}_2\text{O}_5}^{\text{bulk}}$  can be expressed as follows, where the chemical potential of oxygen can vary under ORR conditions:

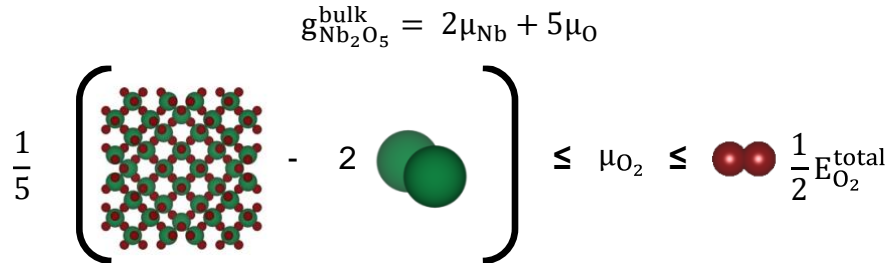

**Fig. S3 | Range of allowed O chemical potentials.**

In low oxygen potential environment:

$$\min[\mu_{\text{O}}(T, P)] = \frac{1}{5} (g_{\text{Nb}_2\text{O}_5}^{\text{bulk}}(0,0) - 2g_{\text{Nb}}^{\text{bulk}}(0,0))$$

where,  $g_{\text{Nb}_2\text{O}_5}^{\text{bulk}}$  and  $g_{\text{Nb}}^{\text{bulk}}$  are the Gibb's free energy of bulk Niobium oxide and metallic Niobium. In high oxygen potential environment:

$$\max[\mu_{\text{O}}(T, P)] = \frac{1}{2} E_{\text{O}_2}^{\text{total}}$$

where,  $E_{\text{O}_2}^{\text{total}}$  is the total energy of free, isolated  $\text{O}_2$  molecule.

**For our purpose, we consider only the high oxygen potential since there is constant supply of molecular oxygen during the ORR experiments.**

### 4.2 Oxygen molecule chemical potential

The chemical potential of oxygen molecule  $\mu_{\text{O}_2(\text{g})}$  is derived from the standard free energy change of the reaction (equation (a)) in two steps:

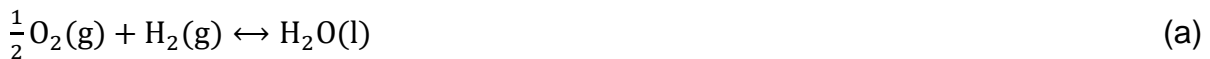

First we take the experimental standard free energy change of equation (a). It is -2.46eV as shown in equation (b)<sup>6</sup>

$$\Delta G_{\text{H}_2\text{O}(\text{l})}^0 = G_{\text{H}_2\text{O}(\text{l})}^0 - \frac{1}{2}G_{\text{O}_2(\text{g})}^0 - G_{\text{H}_2(\text{g})}^0 = -2.46\text{eV} \quad (\text{b})$$

Next we compute the chemical potential of water as follows,

$$\mu_{\text{H}_2\text{O}(\text{l})} = \mu_{\text{H}_2\text{O}(\text{g})} = \left( E_{\text{DFT}}^{\text{H}_2\text{O}(\text{g})} + \text{ZPE}_{\text{H}_2\text{O}(\text{g})} - \text{TS}_{\text{H}_2\text{O}(\text{g})}^0 \right) \quad (\text{c})$$

Combining the values from equations (a) and (b), the chemical potential of oxygen molecule is approximated as:

$$\mu_{\text{O}_2(\text{g})} = 4.92 + 2 \left( E_{\text{DFT}}^{\text{H}_2\text{O}(\text{g})} + \text{ZPE}_{\text{H}_2\text{O}(\text{g})} - \text{TS}_{\text{H}_2\text{O}(\text{g})}^0 \right) - 2 \left( E_{\text{DFT}}^{\text{H}_2(\text{g})} + \text{ZPE}_{\text{H}_2(\text{g})} - \text{TS}_{\text{H}_2(\text{g})}^0 \right) \quad (\text{d})$$

As we mentioned earlier, we are interested in the O-rich environment and use the value of O potential from equation (d) in the formation energy calculations.

#### 4.3 Enthalpy of formation of stable form of dopant

To calculate the formation energies of the doped Nb<sub>2</sub>O<sub>5</sub> systems, we require  $\mu_{\text{M}}$ , chemical potential of the dopant metal, M. For this the  $\Delta H_{\text{f}}^{\text{M}_x\text{O}_y}$ , enthalpy of formation of the stable oxide form of the dopant metal at standard conditions is needed. We have  $\Delta H_{\text{f}}^{\text{M}_x\text{O}_y}$  values from Wagman et al.<sup>7</sup> We first calculate the  $\Delta G_{\text{f}}^{\circ}/n_{\text{M}}$  (where  $n_{\text{M}}$  = number of metal atoms in the formula) for different stoichiometries in which a metal exists in its oxide form (M<sub>x</sub>O<sub>y</sub>). The metal oxide with the lowest value of  $\Delta G_{\text{f}}^{\circ}/n_{\text{M}}$  or the free energy of formation per metal atom at standard conditions is used as the reference. For some of the oxides, the free energy of formation data is unavailable in the reference paper. We approximate their  $\Delta G_{\text{f}}^{\circ}$  by adding the entropic contribution from molecular oxygen to the  $\Delta H_{\text{f}}^{\circ}$  of that oxide (equations shown below) from the same reference. It is assumed that metal, M(s) and the M<sub>x</sub>O<sub>y</sub>(s) do not contribute to the entropy [ $x\text{M}(\text{s}) + y/2\text{O}_2(\text{g}) \rightarrow \text{M}_x\text{O}_y(\text{s})$ ]. At 1 bar pressure and 298.15K temperature, the entropy of O<sub>2</sub> is 205.138 J<sup>-1</sup>mol<sup>-1</sup>. Thus, the free energy of formation of a metal oxide is attained as:

$$\begin{aligned} \Delta G_{\text{f}}^{\circ} &= \Delta H_{\text{f}}^{\circ} - T (-\Delta S_{\text{f}}^{\circ} \text{O}_2) \\ \Delta G_{\text{f}}^{\circ} &= \Delta H_{\text{f}}^{\circ} - 298.15 \text{ K} (-205.138 \text{ J}^{-1}\text{mol}^{-1}) \\ \Delta G_{\text{f}}^{\circ} &= \Delta H_{\text{f}}^{\circ} + 61161.8947 \text{ Jmol}^{-1} \\ \Delta G_{\text{f}}^{\circ} &= \Delta H_{\text{f}}^{\circ} + 61.162 \text{ KJmol}^{-1} \end{aligned}$$

The values of  $\Delta G_{\text{f}}^{\circ}$  and  $\Delta H_{\text{f}}^{\circ}$  marked in red are systems where the values are calculated using the above equation. The system highlighted in green in Table S2 is the most stable form among other oxide forms under standard conditions.



**Table S2** | Enthalpy of formation and free energy of formation of the oxide form of the dopant metal at standard conditions.

| <b>Metal Oxide</b>                         | $\Delta G_f^\circ$<br>(kJmol <sup>-1</sup> ) | $\Delta G_f^\circ/n_M$<br>(kJmol <sup>-1</sup> ) | $\Delta H_f^\circ$<br>(kJmol <sup>-1</sup> ) | $\Delta H_f^\circ/n_M$<br>(kJmol <sup>-1</sup> ) | $\Delta H_f^\circ/n_M$<br>(eV) |
|--------------------------------------------|----------------------------------------------|--------------------------------------------------|----------------------------------------------|--------------------------------------------------|--------------------------------|
| <b>Titanium</b>                            |                                              |                                                  |                                              |                                                  |                                |
| TiO( $\alpha$ )                            | -495.00                                      | -495.00                                          | -519.70                                      | -519.70                                          | -5.39                          |
| TiO <sub>2</sub> (anatase)                 | -884.50                                      | -884.50                                          | -939.70                                      | -939.70                                          | -9.74                          |
| TiO <sub>2</sub> (brookite)                | -880.64                                      | -880.64                                          | -941.80                                      | -941.80                                          | -9.76                          |
| TiO <sub>2</sub> (rutile)                  | -889.50                                      | -889.50                                          | -944.70                                      | -944.70                                          | -9.79                          |
| Ti <sub>2</sub> O <sub>3</sub>             | -1434.20                                     | -717.10                                          | -1520.90                                     | -760.45                                          | -7.88                          |
| Ti <sub>3</sub> O <sub>5</sub>             | -2317.40                                     | -772.47                                          | -2459.40                                     | -819.80                                          | -8.50                          |
| <b>Vanadium</b>                            |                                              |                                                  |                                              |                                                  |                                |
| VO                                         | -404.20                                      | -404.20                                          | -431.80                                      | -431.80                                          | -4.48                          |
| V <sub>2</sub> O <sub>3</sub>              | -1139.30                                     | -569.65                                          | -1218.80                                     | -609.40                                          | -6.32                          |
| V <sub>2</sub> O <sub>4</sub> ( $\alpha$ ) | -1318.30                                     | -659.15                                          | -1427.20                                     | -713.60                                          | -7.40                          |
| V <sub>2</sub> O <sub>5</sub>              | -1419.50                                     | -709.75                                          | -1550.60                                     | -775.30                                          | -8.04                          |
| V <sub>3</sub> O <sub>5</sub>              | -1803.00                                     | -601.00                                          | -1933.00                                     | -644.33                                          | -6.68                          |
| V <sub>4</sub> O <sub>7</sub>              | -2456.00                                     | -614.00                                          | -2640.00                                     | -660.00                                          | -6.84                          |
| <b>Chromium</b>                            |                                              |                                                  |                                              |                                                  |                                |
| CrO <sub>2</sub>                           | -536.84                                      | -536.84                                          | -598.00                                      | -598.00                                          | -6.20                          |
| CrO <sub>3</sub>                           | -497.76                                      | -497.76                                          | -589.50                                      | -589.50                                          | -6.11                          |
| Cr <sub>2</sub> O <sub>3</sub>             | -1058.10                                     | -529.05                                          | -1139.70                                     | -569.85                                          | -5.91                          |
| Cr <sub>3</sub> O <sub>4</sub>             | -1408.68                                     | -469.56                                          | -1531.00                                     | -510.33                                          | -5.29                          |
| <b>Manganese</b>                           |                                              |                                                  |                                              |                                                  |                                |
| MnO                                        | -362.90                                      | -362.90                                          | -385.22                                      | -385.22                                          | -3.99                          |
| MnO <sub>2</sub>                           | -465.14                                      | -465.14                                          | -520.03                                      | -520.03                                          | -5.39                          |
| Mn <sub>2</sub> O <sub>3</sub>             | -881.10                                      | -440.55                                          | -959.00                                      | -479.50                                          | -4.97                          |
| Mn <sub>3</sub> O <sub>4</sub>             | -1283.20                                     | -427.73                                          | -1387.80                                     | -462.60                                          | -4.79                          |
| <b>Cobalt</b>                              |                                              |                                                  |                                              |                                                  |                                |
| CoO                                        | -214.2                                       | -214.2                                           | -237.94                                      | -237.94                                          | -2.47                          |
| Co <sub>3</sub> O <sub>4</sub>             | -774                                         | -258                                             | -891                                         | -297                                             | -3.08                          |
| <b>Nickel</b>                              |                                              |                                                  |                                              |                                                  |                                |
| NiO                                        | -211.70                                      | -211.70                                          | -239.70                                      | -239.70                                          | -2.48                          |
| Ni <sub>2</sub> O <sub>3</sub>             | -397.76                                      | -198.88                                          | -489.50                                      | -244.75                                          | -2.54                          |
| <b>Copper</b>                              |                                              |                                                  |                                              |                                                  |                                |
| CuO                                        | -129.7                                       | -129.7                                           | -157.3                                       | -157.3                                           | -1.63                          |
| Cu <sub>2</sub> O                          | -146                                         | -73                                              | -168.6                                       | -84.3                                            | -0.87                          |
| <b>Zinc</b>                                |                                              |                                                  |                                              |                                                  |                                |
| ZnO                                        | -318.30                                      | -318.30                                          | -348.28                                      | -348.28                                          | -3.61                          |

| <b>Metal</b>                   | $\Delta G_f^\circ$<br>(kJmol <sup>-1</sup> ) | $\Delta G_f^\circ/n_M$<br>(kJmol <sup>-1</sup> ) | $\Delta H_f^\circ$<br>(kJmol <sup>-1</sup> ) | $\Delta H_f^\circ/n_M$<br>(kJmol <sup>-1</sup> ) | $\Delta H_f^\circ/n_M$<br>(eV) |
|--------------------------------|----------------------------------------------|--------------------------------------------------|----------------------------------------------|--------------------------------------------------|--------------------------------|
| <b>Yttrium</b>                 |                                              |                                                  |                                              |                                                  |                                |
| Y <sub>2</sub> O <sub>3</sub>  | -1816.60                                     | -908.30                                          | -1905.31                                     | -952.66                                          | -9.87                          |
| <b>Zirconium</b>               |                                              |                                                  |                                              |                                                  |                                |
| ZrO <sub>2</sub>               | -1042.79                                     | -1042.79                                         | -1100.56                                     | -1100.56                                         | -11.41                         |
| <b>Molybdenum</b>              |                                              |                                                  |                                              |                                                  |                                |
| MoO <sub>2</sub>               | -533.01                                      | -533.01                                          | -588.94                                      | -588.94                                          | -6.10                          |
| MoO <sub>3</sub>               | -667.97                                      | -667.97                                          | -745.09                                      | -745.09                                          | -7.72                          |
| <b>Ruthenium</b>               |                                              |                                                  |                                              |                                                  |                                |
| RuO <sub>2</sub>               | -243.84                                      | -243.84                                          | -305                                         | -305                                             | -3.16                          |
| RuO <sub>4</sub>               | -116.98                                      | -116.98                                          | -239.3                                       | -239.3                                           | -2.48                          |
| <b>Rhodium</b>                 |                                              |                                                  |                                              |                                                  |                                |
| Rh <sub>2</sub> O <sub>3</sub> | -251.3                                       | -125.6                                           | -343.0                                       | -171.5                                           | -1.8                           |
| <b>Palladium</b>               |                                              |                                                  |                                              |                                                  |                                |
| PdO                            | -54.82                                       | -54.82                                           | -85.4                                        | -85.4                                            | -0.89                          |
| <b>Hafnium</b>                 |                                              |                                                  |                                              |                                                  |                                |
| HfO <sub>2</sub>               | -1088.20                                     | -1088.20                                         | -1144.70                                     | -1144.70                                         | -11.86                         |
| <b>Tantalum</b>                |                                              |                                                  |                                              |                                                  |                                |
| Ta <sub>2</sub> O <sub>5</sub> | -1911.20                                     | -955.60                                          | -2046.00                                     | -1023.00                                         | -10.60                         |
| <b>Tungsten</b>                |                                              |                                                  |                                              |                                                  |                                |
| WO <sub>2</sub>                | -533.89                                      | -533.89                                          | -589.69                                      | -589.69                                          | -6.11                          |
| WO <sub>3</sub>                | -764.03                                      | -764.03                                          | -842.87                                      | -842.87                                          | -8.74                          |
| <b>Rhenium</b>                 |                                              |                                                  |                                              |                                                  |                                |
| ReO <sub>2</sub>               | -368                                         | -368                                             | -429.16                                      | -429.16                                          | -4.45                          |
| ReO <sub>3</sub>               | -513.26                                      | -513.26                                          | -605                                         | -605                                             | -6.27                          |
| Re <sub>2</sub> O <sub>7</sub> | -1066                                        | -533                                             | -1240.1                                      | -620.05                                          | -6.43                          |
| <b>Osmium</b>                  |                                              |                                                  |                                              |                                                  |                                |
| OsO <sub>3</sub>               | -191.96                                      | -191.96                                          | -283.7                                       | -283.7                                           | -2.94                          |
| OsO <sub>4</sub> (yellow)      | -304.9                                       | -304.9                                           | -394.1                                       | -394.1                                           | -4.08                          |
| OsO <sub>4</sub> (white)       | -303.7                                       | -303.7                                           | -385.8                                       | -385.8                                           | -3.99                          |
| <b>Iridium</b>                 |                                              |                                                  |                                              |                                                  |                                |
| IrO <sub>2</sub>               | -212.94                                      | -212.94                                          | -274.1                                       | -274.1                                           | -2.84                          |
| <b>Platinum</b>                |                                              |                                                  |                                              |                                                  |                                |
| Pt <sub>3</sub> O <sub>4</sub> | -40.68                                       | -13.56                                           | -163                                         | -54.33                                           | -0.56                          |

## 5. Structural modification of doped niobium pentoxide systems, $M\text{-Nb}_{31}\text{O}_{80}$ ( $M$ = dopant transition metals)

**Table S3** | Bond distances between the dopant transition metal and the surrounding O atoms in the  $M\text{-Nb}_{31}\text{O}_{80}$  systems ( $M$  = dopant transition metals).

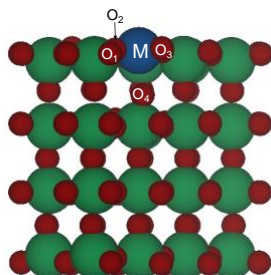

| DOPED SYSTEM                         | Bond distance (Å) |                   |                   |                   |
|--------------------------------------|-------------------|-------------------|-------------------|-------------------|
|                                      | O <sub>1</sub> -M | O <sub>2</sub> -M | O <sub>3</sub> -M | O <sub>4</sub> -M |
| <b>Nb<sub>32</sub>O<sub>80</sub></b> | <b>2.249</b>      | <b>2.009</b>      | <b>1.959</b>      | <b>1.798</b>      |
| Ti-Nb <sub>31</sub> O <sub>80</sub>  | 2.174             | 2.016             | 1.951             | 1.761             |
| V-Nb <sub>31</sub> O <sub>80</sub>   | 2.361             | 2.053             | 1.804             | 1.666             |
| Cr-Nb <sub>31</sub> O <sub>80</sub>  | 2.653             | 1.943             | 1.789             | 1.654             |
| Mn-Nb <sub>31</sub> O <sub>80</sub>  | 2.338             | 1.938             | 1.822             | 1.658             |
| Co-Nb <sub>31</sub> O <sub>80</sub>  | 2.306             | 1.897             | 1.992             | 1.695             |
| Ni-Nb <sub>31</sub> O <sub>80</sub>  | 2.171             | 2.03              | 2.033             | 1.736             |
| Cu-Nb <sub>31</sub> O <sub>80</sub>  | 2.005             | 1.913             | 1.943             | 2.277             |
| Zn-Nb <sub>31</sub> O <sub>80</sub>  | 2.178             | 2.051             | 2.174             | 2.038             |
| Y-Nb <sub>31</sub> O <sub>80</sub>   | 2.325             | 2.237             | 2.277             | 2.17              |
| Zr-Nb <sub>31</sub> O <sub>80</sub>  | 2.242             | 2.100             | 2.081             | 1.963             |
| Mo-Nb <sub>31</sub> O <sub>80</sub>  | 2.216             | 1.928             | 1.866             | 1.735             |
| Ru-Nb <sub>31</sub> O <sub>80</sub>  | 2.112             | 1.952             | 1.96              | 1.781             |
| Rh-Nb <sub>31</sub> O <sub>80</sub>  | 2.103             | 2.084             | 1.994             | 1.804             |
| Pd-Nb <sub>31</sub> O <sub>80</sub>  | 2.112             | 1.976             | 2.040             | 2.116             |
| Hf-Nb <sub>31</sub> O <sub>80</sub>  | 2.187             | 2.071             | 2.062             | 1.935             |
| Ta-Nb <sub>31</sub> O <sub>80</sub>  | 2.171             | 1.989             | 1.96              | 1.801             |
| W-Nb <sub>31</sub> O <sub>80</sub>   | 2.165             | 1.914             | 1.853             | 1.745             |
| Re-Nb <sub>31</sub> O <sub>80</sub>  | 2.125             | 1.881             | 1.890             | 1.768             |
| Os-Nb <sub>31</sub> O <sub>80</sub>  | 2.075             | 1.934             | 1.939             | 1.793             |
| Ir-Nb <sub>31</sub> O <sub>80</sub>  | 2.06              | 1.967             | 1.972             | 1.84              |
| Pt-Nb <sub>31</sub> O <sub>80</sub>  | 2.063             | 1.989             | 1.988             | 1.881             |
| Au-Nb <sub>31</sub> O <sub>80</sub>  | 2.079             | 2.001             | 2.033             | 2.741             |

## 6. Linear Scaling relations

The ORR intermediates adsorption on the doped niobium pentoxide was analyzed on both the dopant site ( $c_1$ ) as well as the niobium metal site ( $c_2$ ). When fitting the linear scaling relation, the most stable site for the ORR intermediate adsorption was used. The data points corresponding to  $\Delta G_{OOH^*} > 4.98$  eV,  $\Delta G_{O^*} > 4.86$  eV and  $\Delta G_{OH^*} > 2.2$  eV are shown in the plot but while fitting the scaling lines, these points are excluded.<sup>8-10</sup>

### 6.1 Linear scaling relations between $G_{OOH^*}$ vs $G_{OH^*}$

Data points higher than  $\Delta G_{OOH^*} = 4.98$  eV and  $\Delta G_{OH^*} = 2.2$  eV are neglected and the slope is fixed at 1.

The data points corresponding to Rh, Re, and Pt doped  $Nb_{32-x}O_{80}$  ( $c_1$ ) are neglected since the adsorbate OOH breaks to form  $O^*$  and  $OH$  (refer figure S4 (a)).

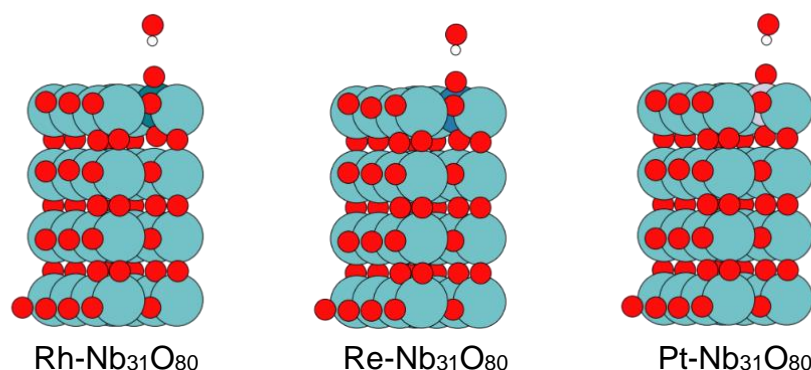

**Fig S4(a) | Side view of ORR adsorbate:** OOH adsorbed on Rh, Re and Pt doped  $Nb_{32-x}O_{80}$  where the binding site is the dopant ( $c_1$ )

The data point corresponding to Cr ( $c_1$ ), Mn ( $c_1$ ) and Co ( $c_2$ ) doped  $Nb_{32-x}O_{80}$  are also neglected. It is seen to be set off from the scaling line. This could be due to structural modification of the doped system during OH adsorption (refer figure S4 (b)) where the Cr, Mn and Co gets off the surface with sub-surface oxygen atoms.

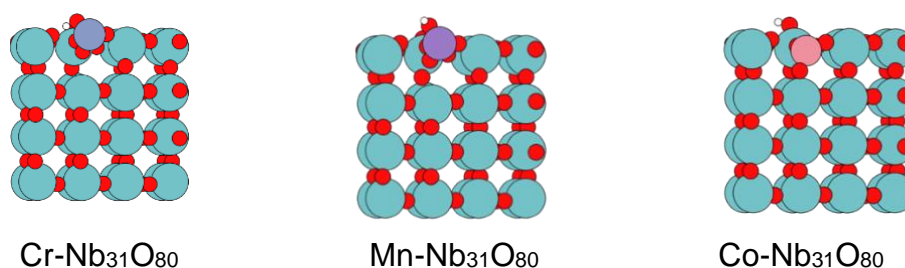

**Fig S4(b) | Side view of ORR adsorbate:** OH adsorbed on Cr( $c_1$ ), Mn ( $c_1$ ) and Co ( $c_2$ ) doped  $Nb_{32-x}O_{80}$ .

## 6.2 Linear scaling relations between $G_{O^*}$ vs $G_{OH^*}$

Data points higher than  $\Delta G_{O^*} = 4.86\text{eV}$  and  $\Delta G_{OH^*} = 2.2\text{ eV}$  are neglected and the slope is fixed at 2.

The data points corresponding to Co, Zn, Rh and Au doped  $\text{Nb}_{32-x}\text{O}_{80}$  ( $c_2$ ) are neglected from the linear scaling relations between ORR adsorbates,  $G_{O^*}$  vs  $G_{OH^*}$ . This is because the adsorbate O binds on the non-metal site (O) of the  $\text{Nb}_{32-x}\text{O}_{80}$  surface (refer figure S5). The data points corresponding to Zn doped  $\text{Nb}_{32-x}\text{O}_{80}$  ( $c_1$ ) and Cu doped  $\text{Nb}_{32-x}\text{O}_{80}$  ( $c_2$ ) are neglected since adsorbate O binds on the non-metal site (O) of the  $\text{Nb}_{32-x}\text{O}_{80}$  surface and forms  $\text{O}_2$  (refer figure S5).

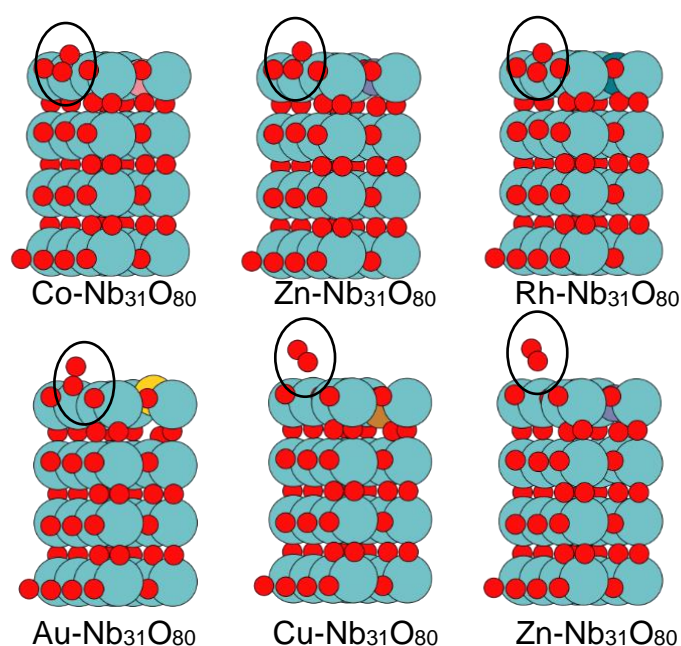

**Fig S5 | Side view of ORR adsorbate:** O adsorbed on Co, Zn, Rh, Au and Cu doped  $\text{Nb}_{32-x}\text{O}_{80}$  where the binding site is the Nb metal atom site ( $c_2$ )

While all the data points are represented in the Figure 3 (data points corresponding to adsorption on both dopant site as well as Niobium metal site), the deviation of few doped systems from the doped  $\text{Nb}_2\text{O}_5$  scaling line can be attributed to:

1. The doped  $\text{Nb}_2\text{O}_5$  systems with free energy values of  $\text{OOH}^*$ ,  $\text{O}^*$  and  $\text{OH}^*$  higher than 4.98, 4.86 and 2.2 eV respectively are excluded while fitting the linear scaling relation.
2. The scaling relation corresponds only to the most stable site of adsorption.
3. The slope of the scaling lines has also been fixed at 1 and 2 in case of  $\Delta G_{\text{OOH}^*}$  vs  $\Delta G_{\text{OH}^*}$  and  $\Delta G_{\text{O}^*}$  vs  $\Delta G_{\text{OH}^*}$  respectively for ease of comparison with the Ideal metal scaling relations.

4. In case of few doped systems with OOH adsorption, the adsorbate OOH breaks to form O\* and OH. These systems are neglected from the scaling relation.
5. In few doped systems with O adsorption, the adsorbate O binds on the non-metal site (O) of the Nb<sub>32-x</sub>O<sub>80</sub> surface. These systems are neglected from the scaling relation.

**NOTE:**  $c_1$  and  $c_2$  represents site of adsorption of the ORR intermediates: on dopant and Nb site respectively.

It is worth noting that under ORR reaction conditions, the realistic surface may not always be the pristine stoichiometric system. Ir-doped Nb<sub>2</sub>O<sub>5</sub> systems has the pristine stoichiometric surface stable at the operating potential ( $U=0.8V_{RHE}$ )

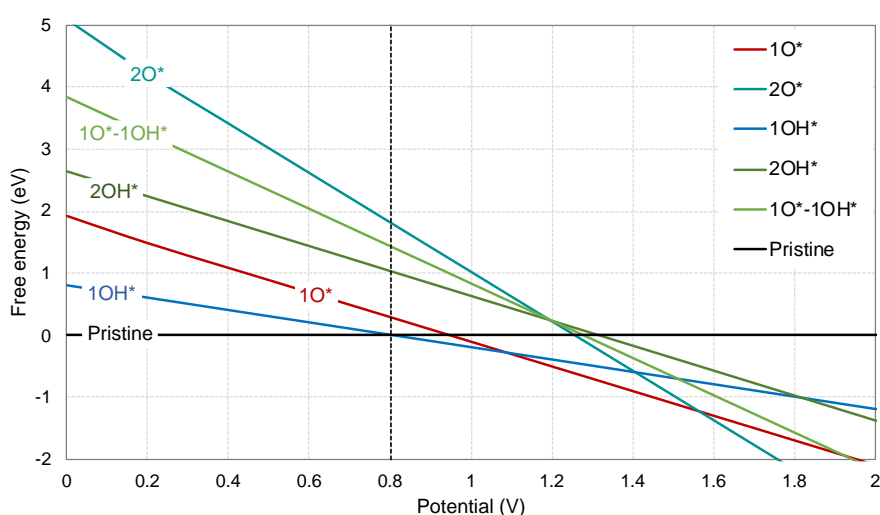

**Fig S6** | Free energies versus applied potential (vs RHE) for different surface coverages on Ir-Nb<sub>31</sub>O<sub>80</sub> (110) at pH = 0. The \* represent the adsorption site on Nb<sub>2</sub>O<sub>5</sub> (110). The vertical dashed line 0.8 V shows the working potential for ORR.

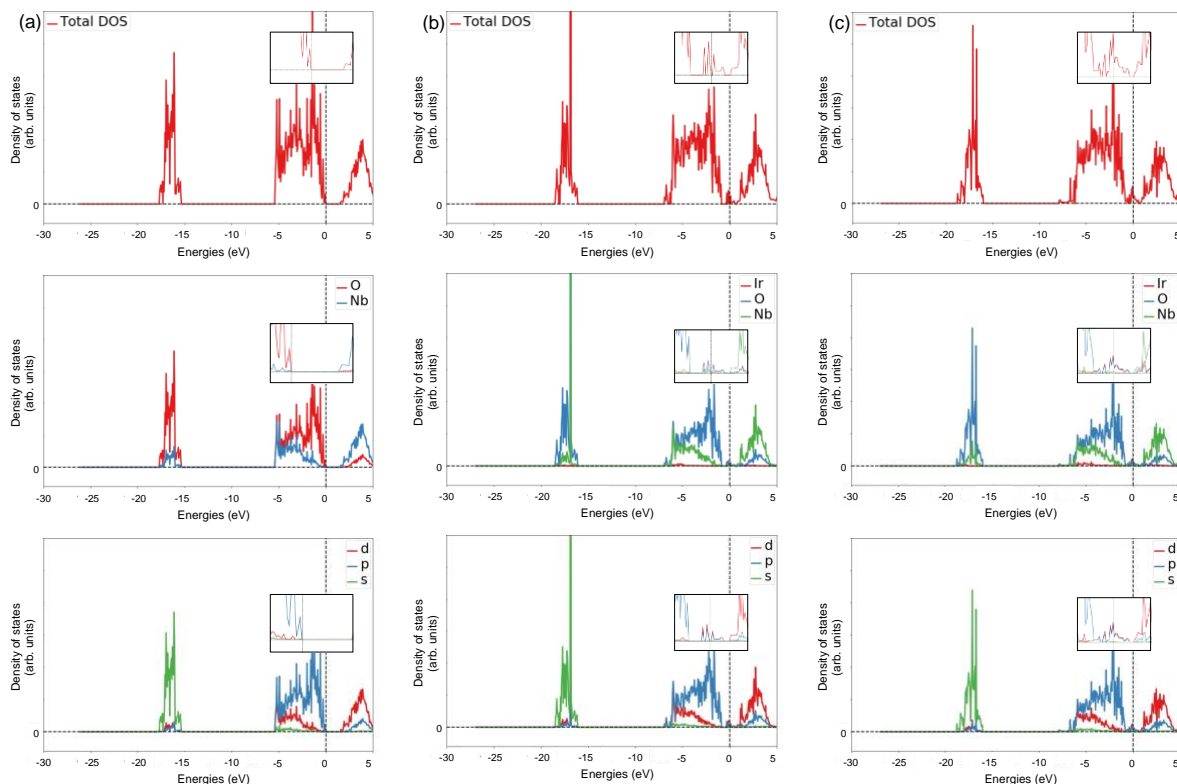

**Fig S7 | Calculated TDOS and PDOS of (a)  $\text{Nb}_{32}\text{O}_{80}$  (110), (b)  $\text{Ir-Nb}_{31}\text{O}_{80}$  (c)  $2\text{Ir-Nb}_{30}\text{O}_{80}$ . Fermi level ( $E_f$ ) is represented by the vertical black dashed line.**

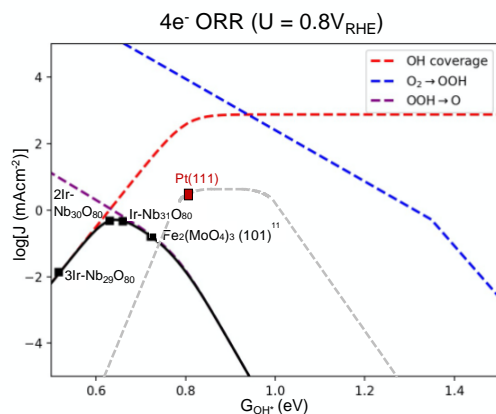

**Fig S8 | Kinetic volcano model for the 4e- ORR process at 0.8  $V_{\text{RHE}}$  for doped niobium oxide system (110) (solid black line) and TM systems (dashed grey line) using the kinetic model outlined in ref 11.**

*Red square marker represents  $\text{Pt}(111)$ , ORR benchmark catalyst. Dashed lines indicate the activity of the 4e- ORR as solved by rate-determining step analysis with each potential rate-determining step corresponding to TMO system.*

## 7. OH binding energy of IrO<sub>2</sub>(110)

The most stable phase of IrO<sub>2</sub> (110) under reaction conditions is high coverage OH.

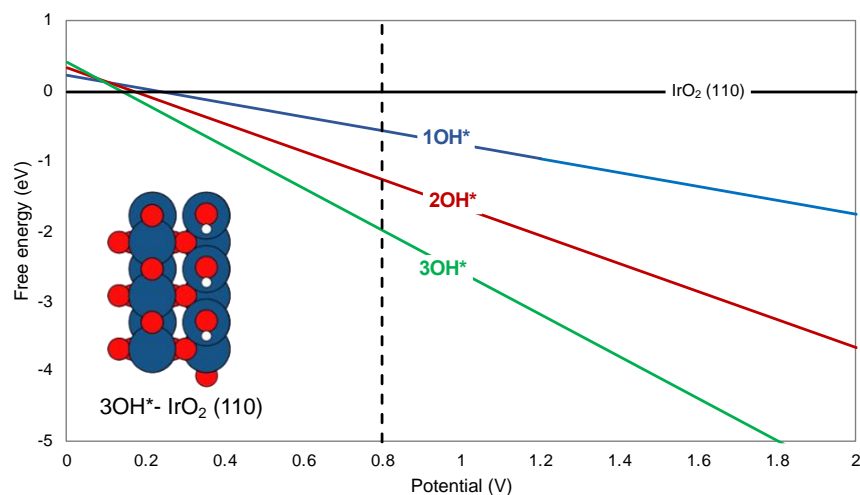

**Fig S9 | Comparing free energies of different OH coverage surfaces sampled for IrO<sub>2</sub> (110) (pH = 0)**

The differential binding energy of \*OH on IrO<sub>2</sub> (110) can be given by:

$$G_b^{\text{diff}} = G_{n\text{OH}^*+\text{slab}} - (G_{(n-1)\text{OH}^*+\text{slab}} + G_{\text{H}_2\text{O}} - 0.5G_{\text{H}_2})$$

where  $n$  is the number of OH adsorbed on the slab,  $G_{n\text{OH}^*+\text{slab}}$  is the total energy of the surface with  $n$  adsorbed OH and is calculated relative to the H<sub>2</sub>O (g) and H<sub>2</sub> (g).

**Table S4 | Differential OH binding energy at high coverage on IrO<sub>2</sub> (110)**

| System                   | IrO <sub>2</sub> (110)                                                              | 1OH*                                                                                | 2OH*                                                                                 | 3OH*                                                                                  |
|--------------------------|-------------------------------------------------------------------------------------|-------------------------------------------------------------------------------------|--------------------------------------------------------------------------------------|---------------------------------------------------------------------------------------|
| Top view                 | 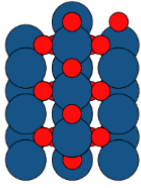 |  |  |  |
| Electronic energy (eV)   | -493.409                                                                            | -504.665                                                                            | -515.991                                                                             | -527.344                                                                              |
| $E_b^{\text{diff}}$ (eV) |                                                                                     | -0.087                                                                              | -0.158                                                                               | -0.186                                                                                |
| $G_b^{\text{diff}}$ (eV) |                                                                                     | 0.051                                                                               | -0.021                                                                               | -0.048                                                                                |



## REFERENCES

- [1] G. T. Kasun Kalhara Gunasooriya and Jens K. Nørskov, Analysis of Acid-Stable and Active Oxides for the Oxygen Evolution Reaction. *ACS Energy Lett.* 2020, **5**, 3778-3787.
- [2] Joseph A. Gauthier, Colin F. Dickens, Leanne D. Chen, Andrew D. Doyle and Jens K. Nørskov, Solvation Effects for Oxygen Evolution Reaction Catalysis on IrO<sub>2</sub>(110). *J. Phys. Chem. C*, 2017, **121**, 11455.
- [3] Zhenbin Wang, Ya-Rong Zheng, Ib Chorkendorff, and Jens K. Nørskov, Acid-Stable Oxides for Oxygen Electrocatalysis, *ACS Energy Lett.*, 2020, **5**, 2905.
- [4] Olga Vinogradova, Dilip Krishnamurthy, Vikram Pande, and Venkatasubramanian Viswanathan, Quantifying Confidence in DFT-Predicted Surface Pourbaix Diagrams of Transition-Metal Electrode–Electrolyte Interfaces. *Langmuir*, 2018, **34**, 12259.
- [5] Karsten Reuter and Matthias Scheffler, Composition, structure, and stability of RuO<sub>2</sub>(110) as a function of oxygen pressure. *Phys. Rev. B*, 2001, **65**, 035406-1.
- [6] A. J. Bard and M. A. Fox, Artificial Photosynthesis: Solar Splitting of Water to Hydrogen and Oxygen. *Acc. Chem. Res.* 1995, **28**, 141.
- [7] D. D. Wagman, W. H. Evans, V. B. Parker, R. H. Schumm, I. Halow, S. M. Bailey, K. L. Churney and R. L. Nuttall, The NBS tables of chemical thermodynamics properties: Selected Values for Inorganic and C1 and C2 Organic Substances in SI Units. 1982, **11**.
- [8] W. H. Koppenol and J. Butler, Energetics of interconversion reactions of oxyradicals, *Advances in Free Radical Biology & Medicine*, 1985, **1**, 91.
- [9] Allen J. Bard, Roger Parsons and Joseph Jordan, Standard Potentials in Aqueous Solution. (1st ed.). Routledge, 1985.
- [10] David A. Armstrong, Robert E. Huie, Willem H. Koppenol, Sergei V. Lymar, Gábor Merényi, Pedatsur Neta, Branko Ruscic, David M. Stanbury, Steen Steenken and Peter Wardman, Standard Electrode Potentials Involving Radicals in Aqueous Solution: Inorganic Radicals. *Bioinorg. React. Mech.* 2013, **9**, 59.
- [11] Hao Li, Sara Kelly, Dan Guevarra, Zhenbin Wang, Yu Wang, Joel A. Haber, Megha Anand, G.T. Kasun Kalhara Gunasooriya, Christina Susan Abraham, Sudarshan Vijay, John M. Gregoire and Jens K. Nørskov, Analysis of the Limitations in the Oxygen Reduction Activity of Transition Metal Oxide Surfaces. *Nature Catal*, 2021, **4**, 463.
